# Supplementary material
Source: PubMed Central journal article supplement (PMC3993191)
Supplement: AEM.00064-14_zam999105253so1.pdf [file AEM.00064-14_zam999105253so1.pdf]

**Table S1. Primers used in this study**

| <b>Primers</b>        | <b>Sequence (5'-3')</b>        | <b>Applications</b>                    |
|-----------------------|--------------------------------|----------------------------------------|
| <i>perR</i> -upF      | ATGGATCCGGTAATCTTTTTATGCTC     | Deletion of <i>perR</i>                |
| <i>perR</i> -upR      | GATACTGAAGGCTAGAGAGG           | Deletion of <i>perR</i>                |
| <i>perR</i> -dnF      | AAGGATCCAGCAAGAACAAGTGGCTAG    | Deletion of <i>perR</i>                |
| <i>perR</i> -dnR      | CTCATCGTCACGATCCATGTTTG        | Deletion of <i>perR</i>                |
| <i>mntA</i> -upF      | ATAAGGATCCAGCAGGCTGCTAG        | Deletion of <i>mntA</i>                |
| <i>mntA</i> -upR      | CTTCTTGGCTCTGGGGATCA           | Deletion of <i>mntA</i>                |
| <i>mntA</i> -dnF      | ATAAGGATCCGCTACTACAGCATGATG    | Deletion of <i>mntA</i>                |
| <i>mntA</i> -dnR      | CGGTGTTGTTTTCGTCCAAGACAAG      | Deletion of <i>mntA</i>                |
| <i>perR</i> -com-F    | AAGAATTCGTGATAGAAAACCAGCTG     | Complementation of <i>perR</i>         |
| <i>perR</i> -com-R    | ATATGTCGACCTAGCTAGCCACTTGTTTC  | Complementation of <i>perR</i>         |
| <i>mntABC</i> -com-F  | AAGAATTCCTTGTCTCACTTTCATAC     | Overexpression of <i>mntABC</i>        |
| <i>mntABC</i> -com-R  | ATATGTCGACTTATTTAGACAGACCTTCTG | Overexpression of <i>mntABC</i>        |
| <i>PmntABC</i> -BamHI | AATAGGATCCGATAATCCCTGTGATAGTCG | <i>mntABC</i> luciferase reporter      |
| <i>PmntABC</i> -NheI  | AATAGCTAGCCAAAGGTAACAGGCTTG    | <i>mntABC</i> luciferase reporter      |
| 16S-F                 | AGAGTTTGATCCTGGCTC             | qRT-PCR strandard curve of 16S rDNA    |
| 16S-R                 | GATGTTAGGCTTGA CTCTGAC         | qRT-PCR strandard curve of 16S rDNA    |
| <i>mntH</i> -F        | GGTGGCTCTCACATTGTT             | qRT-PCR strandard curve of <i>mntH</i> |
| <i>mntH</i> -R        | CCAAGGATGGAAAGACCT             | qRT-PCR strandard curve of <i>mntH</i> |
| <i>mntA</i> -F        | CGTTTCTTAGTTCTGCTTTTG          | qRT-PCR strandard curve of <i>mntA</i> |
| <i>mntA</i> -R        | CATAAAGTAGTACGACATCATCG        | qRT-PCR strandard curve of <i>mntA</i> |
| <i>dpr</i> -F         | GGAGCAGGCATTTACAGAGGAAC        | qRT-PCR strandard curve of <i>dpr</i>  |
| <i>dpr</i> -R         | CCAGAGTTAGAAAGAAGAGCATGA       | qRT-PCR strandard curve of <i>dpr</i>  |
| q16S -F               | CGATACATAGCCGACCTGAGAG         | qRT-PCR of 16S rDNA                    |
| q16S-R                | TCCGTCCATTGCCGAAGATTC          | qRT-PCR of 16S rDNA                    |
| q <i>mntH</i> -F      | GGGATTCTCTGTGCTGCTATC          | qRT-PCR of <i>mntH</i>                 |
| q <i>mntH</i> -R      | GCAACGATGACCGCAATA             | qRT-PCR of <i>mntH</i>                 |

|                 |                          |                        |
|-----------------|--------------------------|------------------------|
| <i>qmntA</i> -F | ACATGAATACGAGCCTCTGCCTG  | qRT-PCR of <i>mntA</i> |
| <i>qmntA</i> -R | GCCTCCAAGTAAATCACGTCC    | qRT-PCR of <i>mntA</i> |
| <i>qdpr</i> -F  | GAAGATTTCAATCACGCGCTCCAA | qRT-PCR of <i>dpr</i>  |
| <i>qdpr</i> -R  | TTATACAGCTCGTATCGCTCTT   | qRT-PCR of <i>dpr</i>  |

---

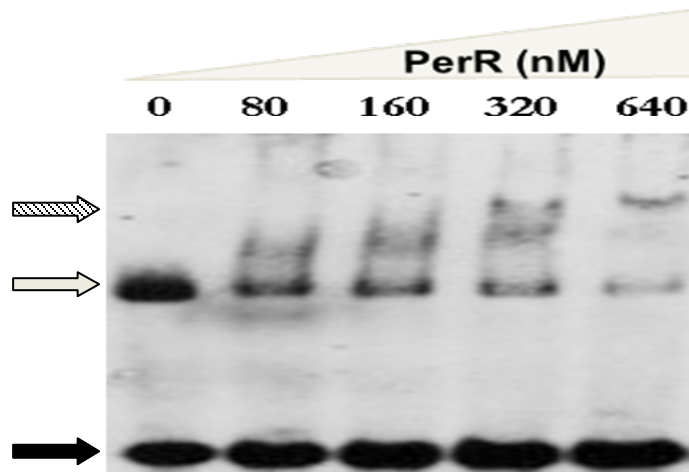

**Fig. S1. EMSA detects the binding of GST-PerR protein to *dpr* promoter.**

Recombinant GST-PerR protein was overexpressed in *Escherichia coli* BL21(DE3)PLYsS strain and purified as recommended by GE Healthcare. DNA fragment including intact *dpr* promoter (229 bp) was PCR amplified with 5' biotin labeled primers and gel purified. A labeled 50-bp DNA fragment, which contains the putative binding site of the response regulator ComE (*com* box) located in the promoter region of *comC* gene, was included as the negative control. The 20  $\mu$ l reaction mixtures contained various concentrations of PerR protein (ranging from 0-640 nM), each of 0.2 nM biotin-labeled *dpr* promoter and *com* box fragment, 20 mM Tris-HCl (pH 8.0), 5% glycerol, 1mM dithiothreitol, 50 mM KCl, 5 mM MnCl<sub>2</sub>, 50  $\mu$ g/ml BSA, 40 ng/ $\mu$ l poly(dI-dC), 1U/ $\mu$ l catalase. After incubation for 20 min at 20°C, the reaction mixtures were separated on a 6% polyacrylamide gel. The DNA-protein complex was transferred onto a nylon membrane, and the biotin-labeled DNA was detected by LightShift Chemiluminescent EMSA Kit (Pierce, Rockford, IL). The added PerR concentrations are indicated above the lanes. Shaded arrow indicates

shifted migration position of the PerR-bound promoter fragment; gray arrow indicates the free DNA fragment, and the black arrow indicates the negative-control DNA (*com* box).

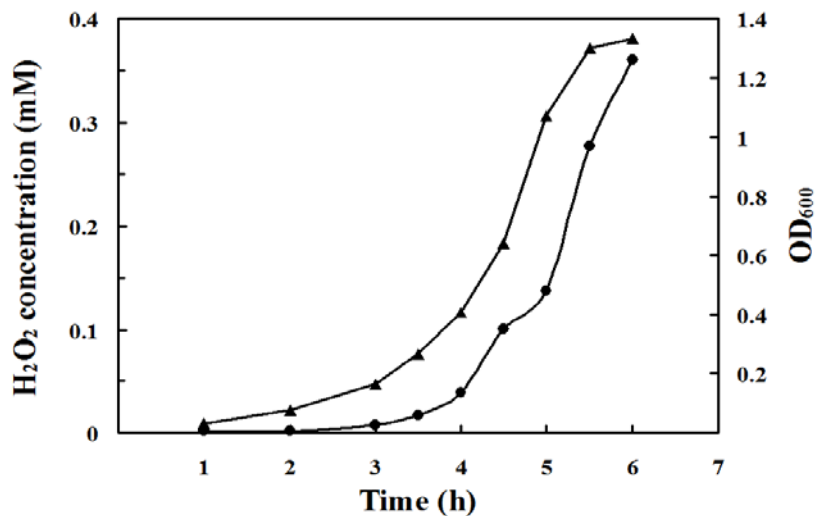

**Fig. S2. Hydrogen peroxide production by *Streptococcus oligofermentans* growing statically in BHI culture.** Overnight culture of *S. oligofermentans* wild strain was diluted at a 1:40 ratio into fresh BHI medium and incubated statically. Cultures were sampled at the time points shown in the figure, and then optical density at 600 nm and H<sub>2</sub>O<sub>2</sub> production were measured as described in “Materials and Methods”. ▲, OD<sub>600</sub>; ●, H<sub>2</sub>O<sub>2</sub> concentration. Data are representative of three independent experiments.
